# Supplementary material
Source: HighWire-hosted journal article supplement (https://bibliotheek.ehb.be:2666/highwire/filestream/164504/field_highwire_adjunct_files/0/bmjqs-2024-017411supp001_data_supplement.pdf)
Supplement: bmjqs-2024-017411supp001_data_supplement.pdf [file bmjqs-2024-017411supp001_data_supplement.pdf]

## Supplementary Figure 1

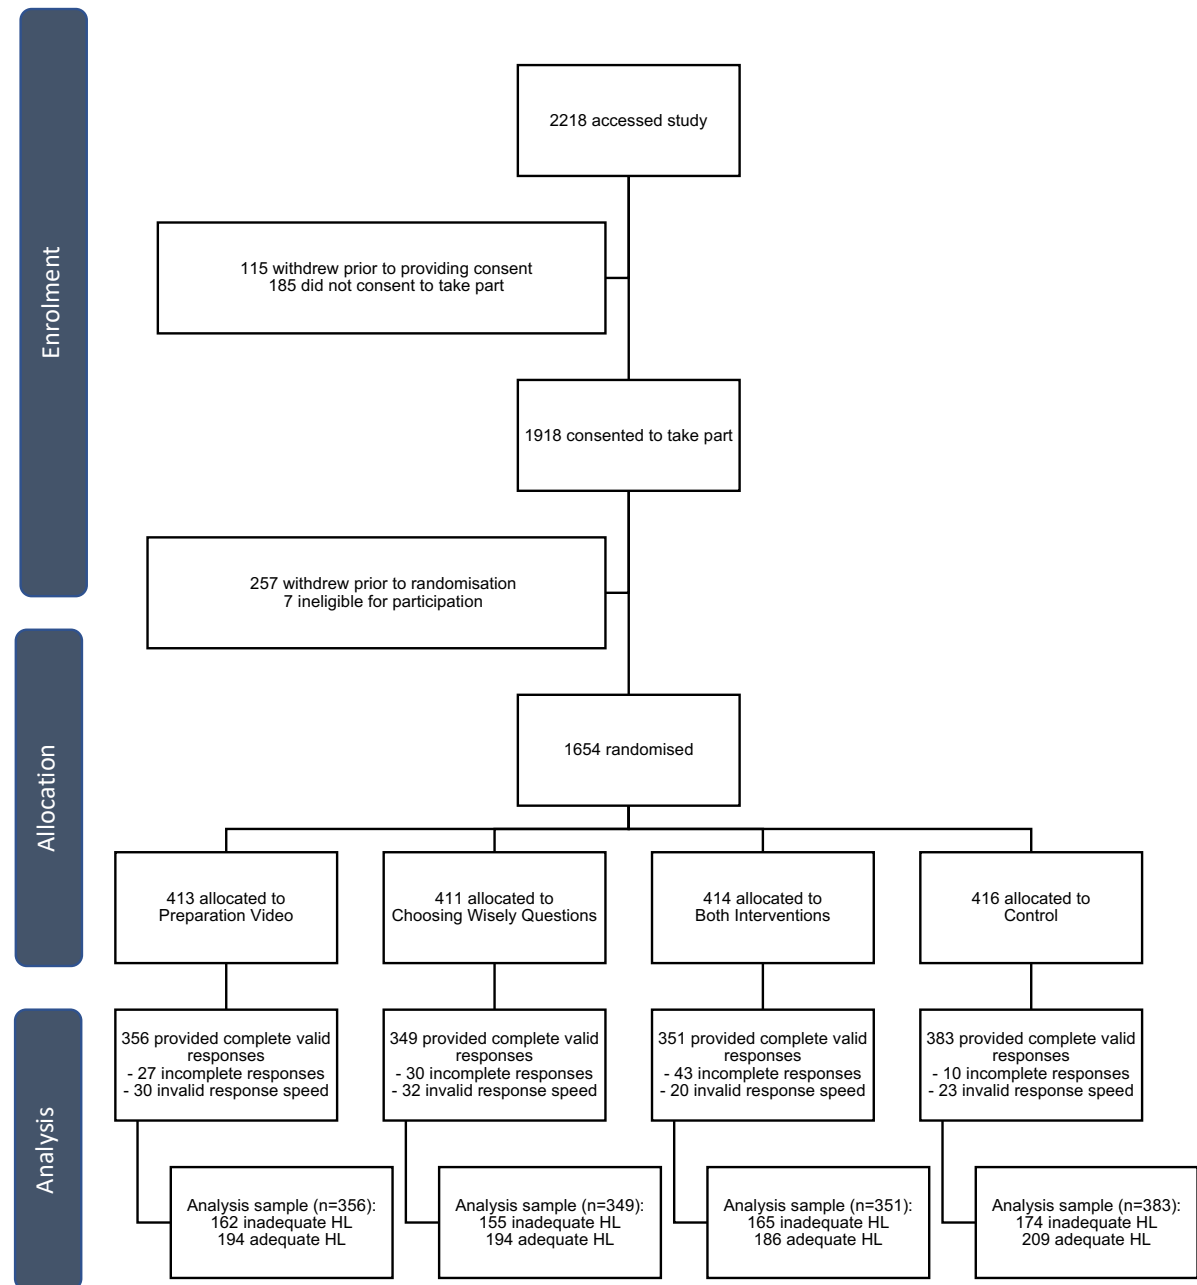

Supplementary Figure 1. Flow of participants through trial. HL = health literacy

**Supplementary Table 1.** Acceptability of interventions and proactive intervention use, stratified by study arm (1-3 only) and health literacy.

|                                         | Study arm     |                   |                            |                 |            |
|-----------------------------------------|---------------|-------------------|----------------------------|-----------------|------------|
|                                         | Video (N=356) | Questions (N=349) | Both interventions (N=351) |                 |            |
|                                         | n (%)         | n (%)             | Video n (%)                | Questions n (%) | Both n (%) |
| <b>Limited health literacy</b>          |               |                   |                            |                 |            |
| Would recommend                         | 135 (83.3)    | 134 (86.4)        | 134 (81.2)                 | 138 (83.6)      | 134 (81.2) |
| Would use again                         | 96 (59.3)     | 136 (87.7)        | 107 (64.8)                 | 129 (78.2)      | 121 (73.3) |
| Proactively accessed the intervention – | 7 (4.3)       | 7 (4.5)           | 4 (2.4)                    | 4 (2.4)         | 2 (1.2)    |
| <b>Adequate health literacy</b>         |               |                   |                            |                 |            |
| Would recommend                         | 150 (77.3)    | 170 (87.6)        | 150 (80.6)                 | 153 (82.3)      | 156 (83.9) |
| Would use again                         | 81 (41.7)     | 168 (86.6)        | 99 (53.2)                  | 142 (76.3)      | 119 (64.0) |
| Proactively accessed the intervention – | 5 (2.6)       | 23 (11.9)         | 8(4.3)                     | 11 (5.9)        | 4 (2.2)    |
